# Supplementary material
Source: MDPI journal article supplement (https://www.mdpi.com/2073-4344/11/11/1290)
Supplement: s1 [file s1]

# Supplementary Material

## Recombinant Production of Arginyl Dipeptides by L-Amino Acid Ligase RizA Coupled with ATP Regeneration

Sven Bordewick, Tim A. Mast, Ralf G. Berger and Franziska Ersoy

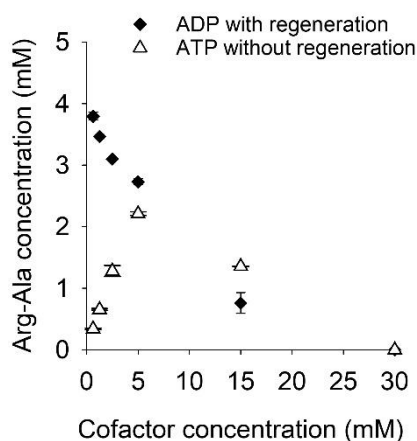

**Figure S1.** Comparison of reaction with or without regeneration. Reaction conditions were not yet optimized and were 30 mM arginine and alanine, 30 mM  $Mg^{2+}$ , 0.2 mg/mL RizA, 20 mM tricine buffer pH 8.0, 25°C, 20 h reaction time, 200  $\mu$ L reaction volume. Reactions without regeneration contained ATP with concentrations between 0.625 and 30 mM. Reactions with regeneration contained 0.25 mg/mL AckA and ADP with concentrations between 0.625 and 30 mM. Both cofactors inhibit the reaction at higher concentrations and 30 mM of each led to no detectable product.

>his6-rizA

```
ATGGGTAGCAGCCATCACCATCATCATCATAGCAGCGGTATGCTGCGTATTCTGCTGATTAATAGCGATAAACCGGAACCGATTTCAG
TTCTTCCAGAAAGATAAAGAAACCAACGACAGCATTAACATCAGCGTTATTACCCGTAGCTGTTATGCACCGCTGTATAGCCATTGG
GCAGATCATGTTTATATTGTGGATGATGTTACCGATCTGACCGTTATGAAAAGCCTGATGCTGGAAATTCGAAAGTTGGTCCGTTT
GATCATATTGTTAGCACCACCGAAAAAGCATTCTGACCGGTGGTTTTCTGCGTAGCTATTTCCGGTATTGCAGGTCCGGGTTTTGAA
ACCGCACTGTATATGACCAATAAACTGGCCATGAAAACCAAACCTGAAAATGGAAGGTATTCCGGTTGCAGATTTTCTGTGTGTTAGC
CAGGTTGAAGATATTCCGGCAGCCGGTGAAAACTTGGTTGGCCGATTATTGTTAAACCGGCATTAGGTAGCGGTGCACTGAATACC
TTTATTATCCATAGCCTGGATCACTATGAGGATCTGTATAGCACCAGCGGTGGTCTGGGTGAACTGAAAAAAAACAATAGCCTGATG
ATCGCCGAAAAGTGCATTGAAATGGAAGAATTTCAATTGCGATACCCTGTATGCCGATGGTGAAATTCGTGTTGTGAGCATCAGCAA
TATACCGTTCCGCTGCTGAAAGGTATGGCAAAAATTCAGGGTAGCTTTATTCTGAGCCAGAATGATCCGGTGTATGCAGAAATTCG
GAACTGCAGAAAAGCGTTGCACAGGCATTTCTGATTACCGATGGTCCGGGTCATCTGGAATCTATCGTACCCATAGTGGCGAACTG
ATTGTGGGTGAAATTGCAATGCGTATTGGTGGTGGTGGCATTAGCCGATGATTGAGAAAAAATCAACATCAGCCTGTGGGAAAGC
AGCCTGAATATTAGCGTTTATCGTGATCCGAATCTGACGGTTAAATCCGATTGAAGGCACCGTTGGTTATTTAGCCTGCCGTGTCGT
AATGGCACCATTAAAGAATTTACCCCGATCGAAGAATGGGAAAAAATGGCAGGTATTCTGGAAAGTTGAACTGCTGATCAAGAGGGT
GATGTGGTTGATGAAAAACAGAGCAGCTCATTTGATCTGGCACGTCTGTATTTTTGCGCTGGAAAAATGAAAATGAAGTGCAGCATCTG
CTGGCACTGGTTAAACAGACCTATTATCTGCATCTGACCGAAGATCACATGATGAACCAGTAA
```

**Sequence S1.** DNA sequence of his6-rizA

>his6-ackA

```
ATGGGCAGCAGCCATCATCATCATCATCACAGCAGCGGCTGGTGCCGCGCGGCAGCCATATGATGTCGAGTAAGTTAGTACTGGTT
CTGAACCTGCGGTAGTTCTTCACTGAAATTTGCCATCATCGATGCAGTAAATGGTGAAAGAGTACCTTTCTGGTTTAGCCGAATGTTTC
CACCTGCCGAAGCAGCATCAAAATGGAATAAGGACGGCAATAAACAGGAAGCGGCTTTAGGTGCAGGCGCCGCTCACAGCGAAGCG
CTCAACTTTATCGTTAATACTATTCTGGCACAAAAACAGAACTGTCTGCGCAGCTGACTGCTATCGGTACCGGTATCGTACACGGC
GGCGAAAAGTATACAGCTCCGTAGTGATCGATGAGTCTGTTATTTCAGGGTATCAAAGATGCAGCTTCTTTTGACCCGCTGCACAAC
CCGGCTCACCTGATCGGTATCGAAGAAGCTCTGAAATCTTTCCACAGCTGAAAAGACAAAAACGTTGCTGTATTTGACACCGCGTTC
CACCAGACTATGCCGAAGAGTCTTACCTCTACGCCCTGCCTTACAACCTGTACAAAGAGCACGGCATCCGTGCTTACGGCGCGCAC
GGCACCAGCCACTTCTATGTAACCCAGGAAGCGGCAAAAATGCTGAACAAACCGGTAGAAAGAACTGAACATCATCACCTGCCACCTG
GGCAACGGTGGTTCCGTTTCTGCTATCCGCAACGGTAAATGCGTTGACACCTCTATGGGCCTGACCCCGCTGGAAGGTCTGGTCATG
GGTACCCGTTCTGGTGATATCGATCCGGCGATCATCTTCCACCTGCACGACACCTGGGCATGAGCGTTGACGCAATCAACAACTG
```



CTGACCAAAGAGTCTGGCCTGCTGGGTCTGACCGAAGTGACCAGCGACTGCCGCTATGTTGAAGACAACTACGCGACGAAAGAAGAC  
GCGAAGCGCGCAATGGACGTTTACTGCCACCGCCTGGCGAAATACATCGGTGCCTTACACTGCGCTGATGGATGGTCGTCTGGACGCT  
GTTGTATTCACTGGTGGTATCGGTGAAAATGCCGCAATGGTTCGTGAACTGTCTCTGGGCAAACCTGGGCGTGCTGGGCTTTGAAGTT  
GATCATGAACGCAACCTGGCTGCACGTTTCGGCAAATCTGGTTTCATCAACAAAGAAGGTACCCGTCCTGCGGTGGTTATCCCAACC  
AACGAAGAACTGGTTATCGCGCAAGACGCGAGCCGCCTGACTGCCTGA

**Sequence S2.** DNA sequence of his6-ackA
